# Supplementary material
Source: PubMed Central journal article supplement (PMC4180802)
Supplement: NIHMS621393-supplement-2.pdf [file NIHMS621393-supplement-2.pdf]

| <b>Toolbox</b> | <b>Reference</b>        | <b>Web reference</b>                                                                                                      |
|----------------|-------------------------|---------------------------------------------------------------------------------------------------------------------------|
| MRtrix         | Tournier et al. (2012)  | <a href="http://www.nitrc.org/projects/mrtrix/">http://www.nitrc.org/projects/mrtrix/</a>                                 |
| TrackVis       | Wang and Wedeen (2007)  | <a href="http://www.trackvis.org/">http://www.trackvis.org/</a>                                                           |
| Camino         | Cook et al., (2008)     | <a href="http://cmic.cs.ucl.ac.uk/camino/">http://cmic.cs.ucl.ac.uk/camino/</a>                                           |
| ExploreDTI     | Leemans et al. (2009)   | <a href="http://www.exploredti.com/generalinfo.htm">http://www.exploredti.com/generalinfo.htm</a>                         |
| ConTrack       | Sherbondy et al. (2008) | <a href="http://vistalab.stanford.edu/newlm/index.php/ConTrack">http://vistalab.stanford.edu/newlm/index.php/ConTrack</a> |
| FDT            | Behrens et al. (2003)   | <a href="http://fsl.fmrib.ox.ac.uk/fsl/fslwiki/FDT">http://fsl.fmrib.ox.ac.uk/fsl/fslwiki/FDT</a>                         |
| DTIStudio      | Jiang and Mori (2003)   | <a href="https://www.mristudio.org/">https://www.mristudio.org/</a>                                                       |
| Tracula        | Yendiki et al. (2011)   | <a href="http://ftp.nmr.mgh.harvard.edu/fswiki/Tracula">http://ftp.nmr.mgh.harvard.edu/fswiki/Tracula</a>                 |

**Supplementary Table 1. Publicly available software to generate connectomes.**

A collection of publicly available software to generate, analyze and visualize white-matter connectomes.
